# Supplementary material
Source: HighWire-hosted journal article supplement (https://bmjmedicine.bmj.com/highwire/filestream/348/field_highwire_adjunct_files/1/bmjmed-2022-000154supp002_data_supplement.pdf)
Supplement: bmjmed-2022-000154supp002_data_supplement.pdf [file bmjmed-2022-000154supp002_data_supplement.pdf]

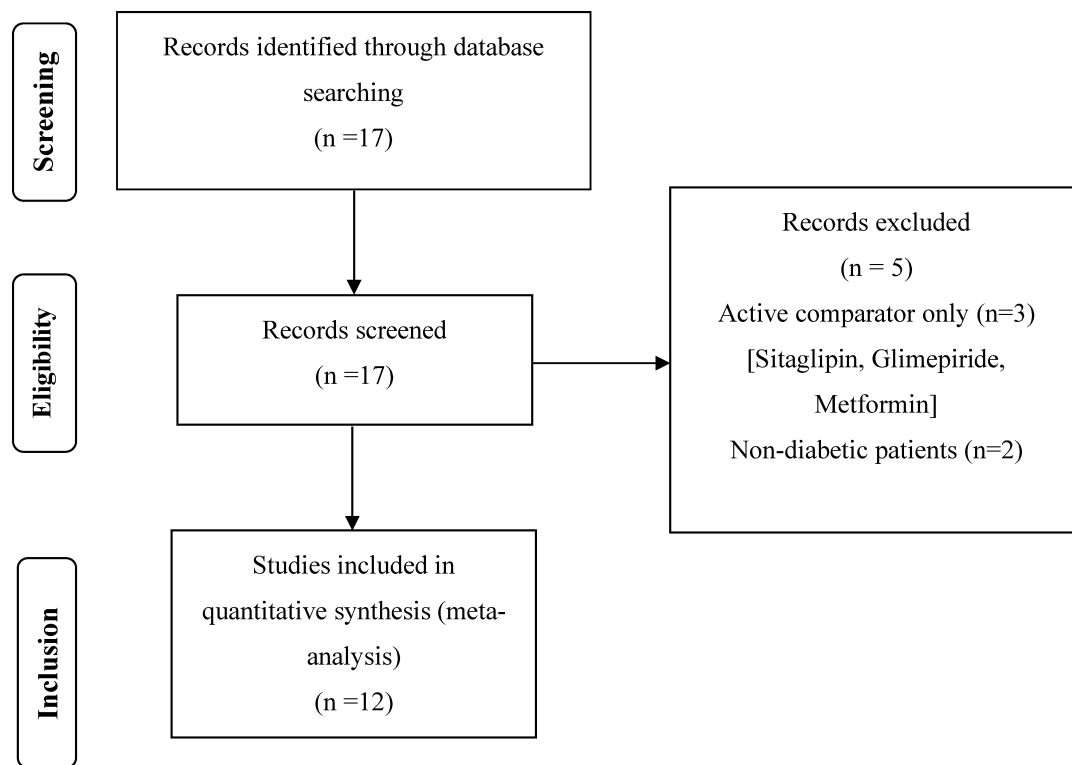

**Appendix 2:**  
*Flowchart describing studies selection from YODA database*  
*Faire un saut de page pour chaque appendice.*
